# Supplementary material for: Leishmania infantum-derived lipophosphoglycan as an antigen in the accurate serodiagnosis of canine leishmaniasis
Source: PLOS journal article supplement (doi:10.1371/journal.pntd.0007720), 2019-09-12

**S1 Figure – LPG-ELISA results for serum samples taken from dogs from an endemic area and presenting negative results in molecular and parasitological assays. (A)** Distribution of LPG-ELISA OD results for the 30 endemic area negative samples at the LPG-ELISA. **(B)** Distribution of the optical density results of the positive and negative controls used for the standardization of the ELISA, now considering the cut-off established with the endemic area negative samples. The bar indicates the cut-off calculated with these 30 negative samples from the endemic area.

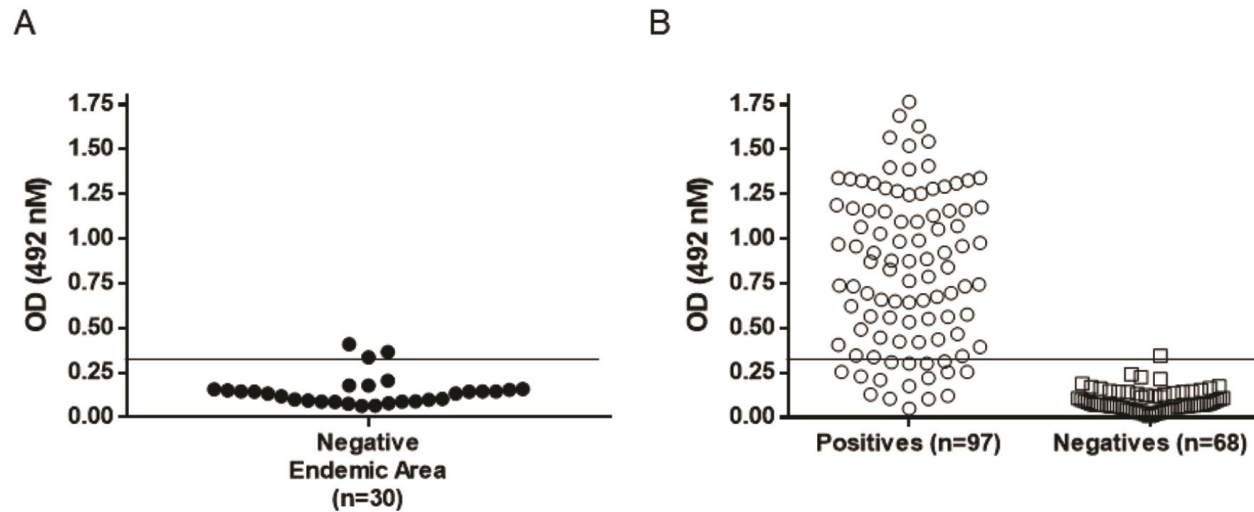

Supplement: S2 (10.1371/journal.pntd.0007720.s002) [file redirect.do]
